# Supplementary material for: CSF and plasma Aβ42/40 across Alzheimer’s disease continuum: comparison of two ultrasensitive Simoa® assays targeting distinct amyloid regions
Source: publisher site journal article supplement (doi:10.1515/cclm-2023-0659), 2023-09-01
Supplement: Supplementary file 1 [file j_cclm-2023-0659_suppl_001.docx]

**Supplementary material**

**Figure S1 Correlations among CSF and plasma Aβ42/Aβ40 assessed by N3PA and N4PE assays.** Heatmap presenting results of Spearman correlation analysis for CSF and plasma Aβ42/Aβ40 assessed across the whole cohort by N3PA and N4PE assays. The color gradient indicates the strength of correlation according to Spearman ρ.


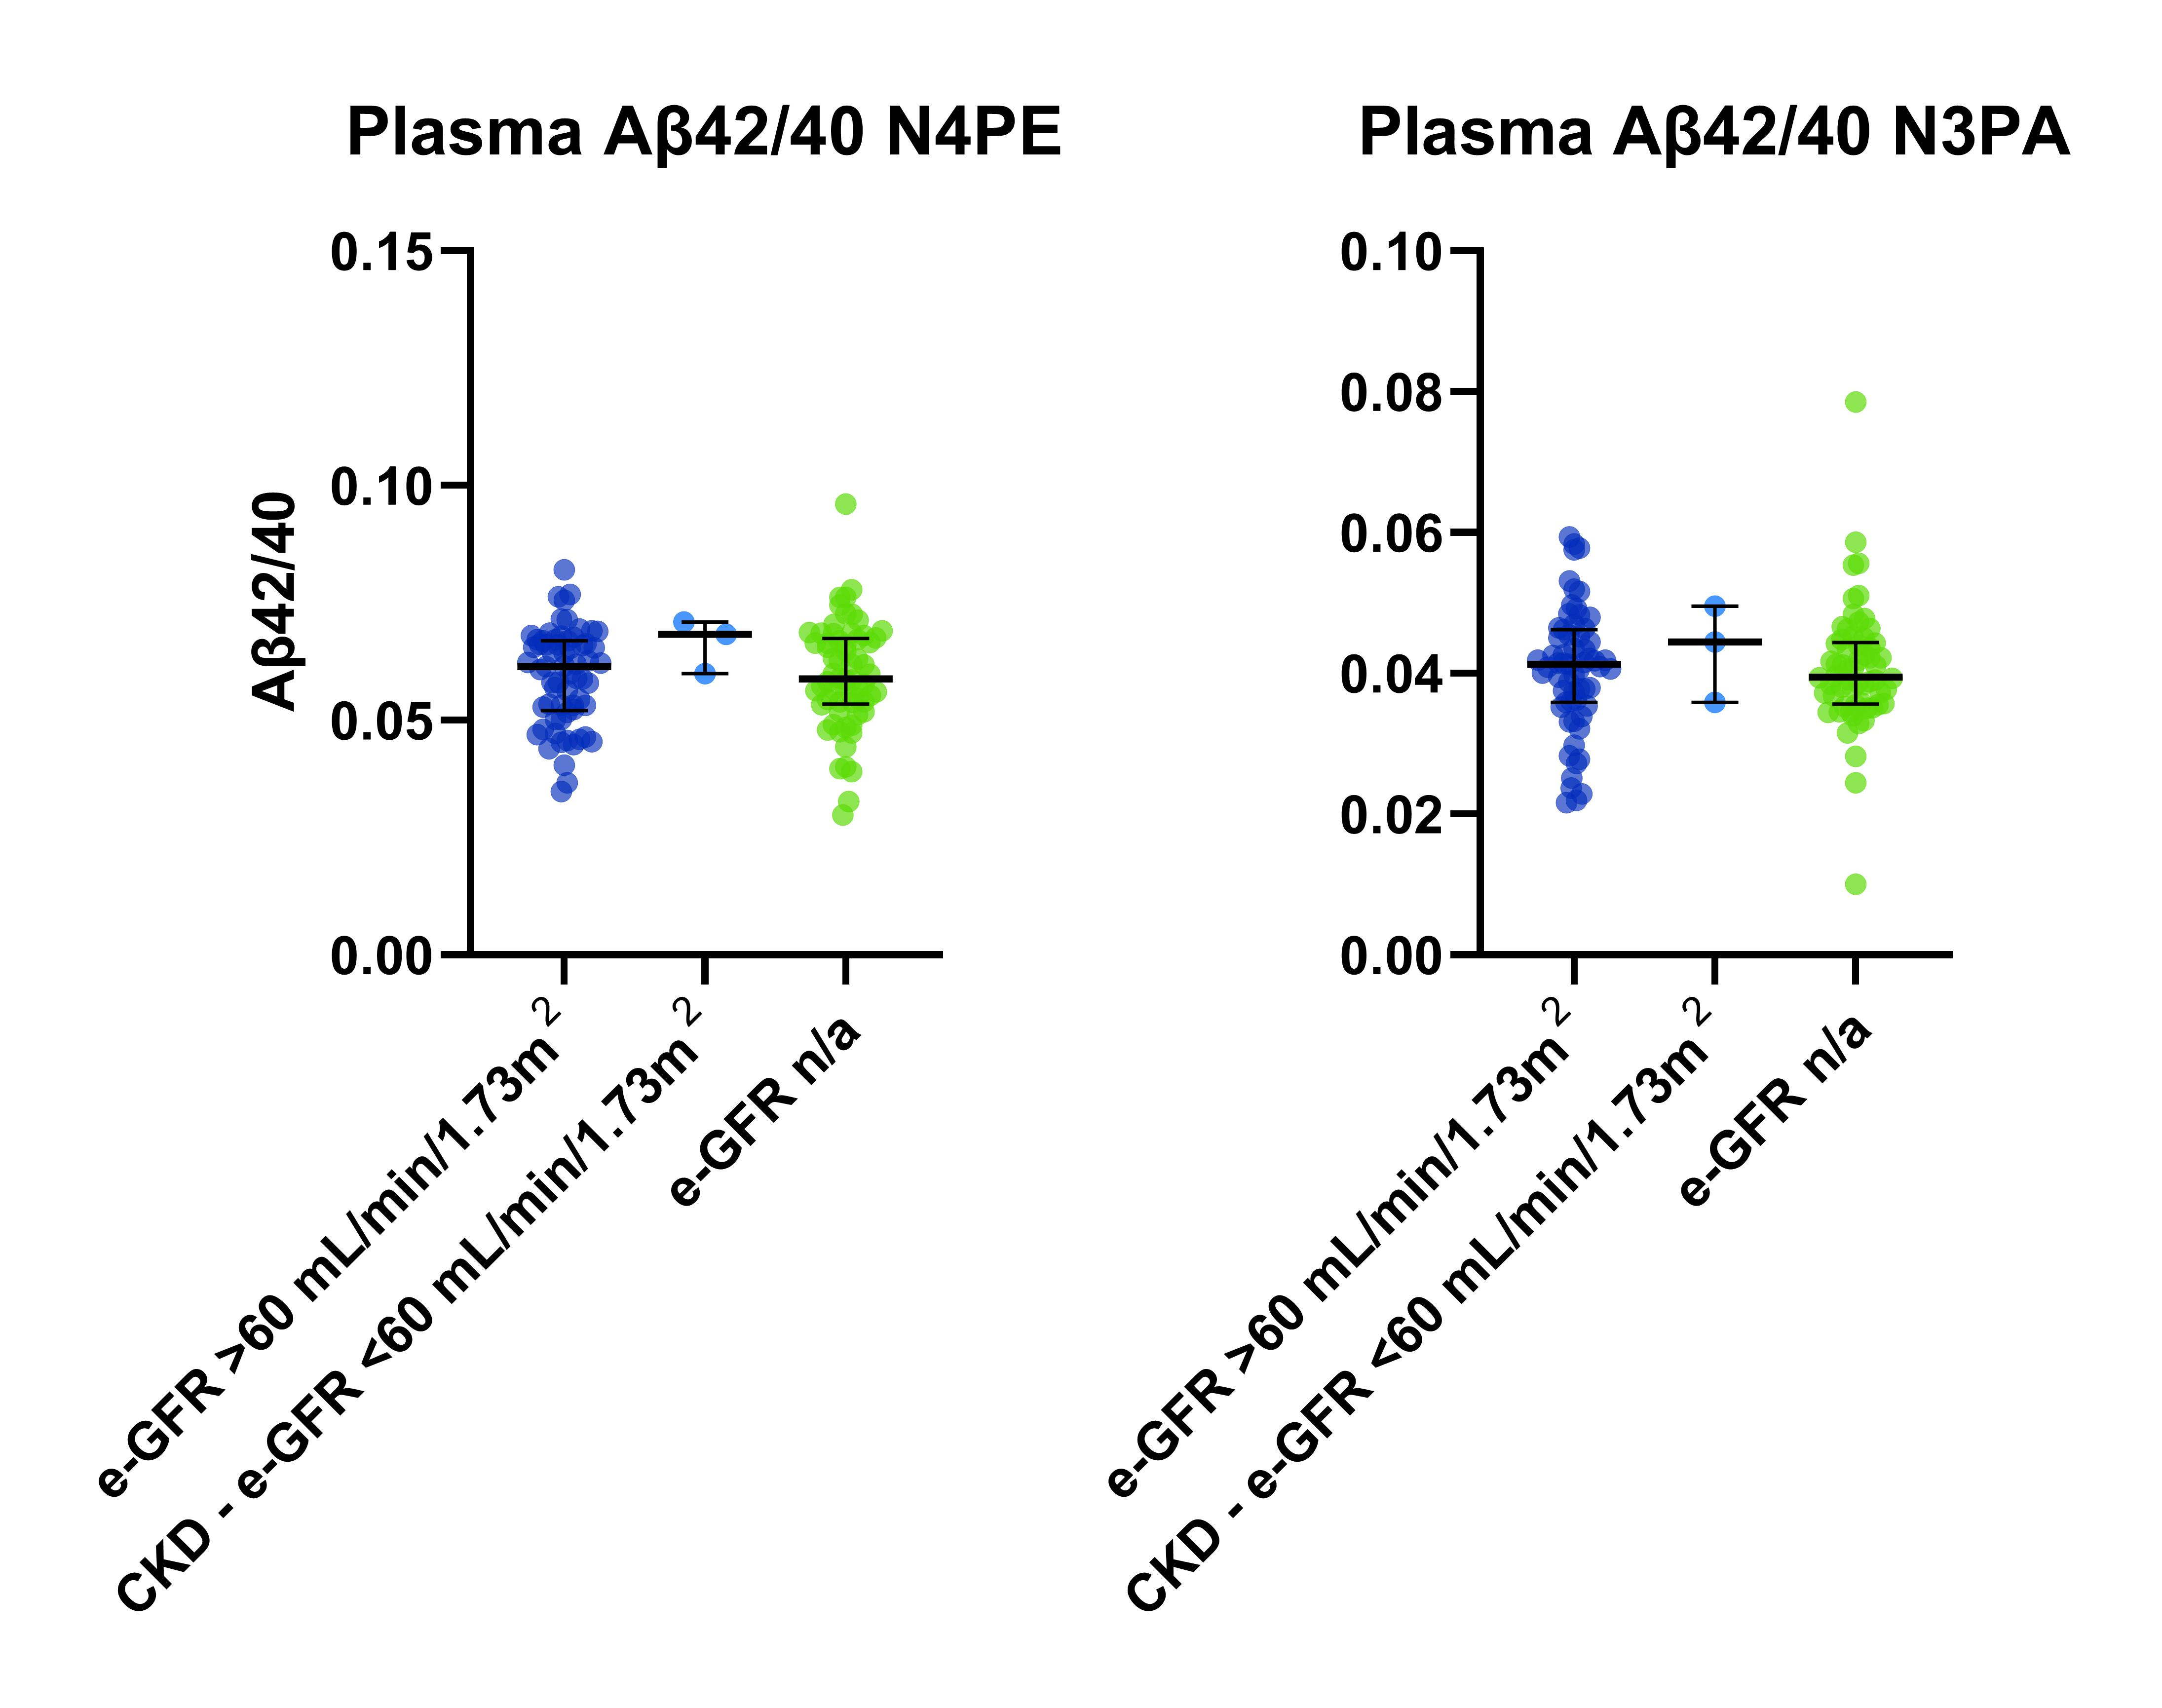
**Figure S2** Plasma Aβ42/40among patients with and without chronic kidney disease (CKD) as assessed by e-GFR. e-GFR calculated by the Chronic Kidney Disease-Epidemiology Collaboration (CKD-EPI) formula with cut-off = 60 (mL/min/1.73m2).

| **Comparison** | **Aβ42/40 assay** | **AUC non-adjusted** | **95% CI (Wilson/Brown)** |
| --- | --- | --- | --- |
|  |
| **CSF CTRL vs. AD-dem** | N4PE | 0.992 | 0.977-1.000 |  |
| N3PA | 0.999 | 0.994-1.000 |  |
| **CSF CTRL vs. MCI-AD** | N4PE | 1 | 0.994-1.000 |  |
| N3PA | 1.000 | 0.998-1.000 |  |
| **CSF CTRL vs. pre-AD** | N4PE | 0.997 | 0.990-1.000 |  |
| N3PA | 0.999 | 0.996-1.000 |  |
| **Plasma CTRL vs. AD-dem** | N4PE | 0.773 | 0.664-0.882 |  |
| N3PA | 0.684 | 0.557-0.811 |  |
| **Plasma CTRL vs. MCI-AD** | N4PE | 0.793 | 0.694-0.892 |  |
| N3PA | 0.716 | 0.596-0.837 |  |
| **Plasma CTRL vs. pre-AD** | N4PE | 0.914 | 0.834-0.994 |  |
| N3PA | 0.726 | 0.595-0.857 |  |
|  |  |  |  |  |

**Table S1** Area Under Curve (AUC) values for comparison of the accuracy of each assay to discriminate between control group and different AD continuum stages (pre-AD, MCI-AD, AD-dem). AUC values with 95% CI calculated by using Wilson/Brown method and AUC values for age- and gender-adjusted AUC with 95% CI calculated by using 2000 bootstrap replicates. AD: Alzheimer’s disease, pre-AD: preclinical AD, MCI-AD: mild cognitive impairment due to AD, AD-dem: AD at dementia stage, CTRL: control group.
